1 **Performance of three diagnostic tests for tuberculosis**  
2 **among Human Immunodeficiency Virus (HIV) patients**  
3 **presenting to a health facility in an informal urban**  
4 **settlement in Nairobi, Kenya.**

5 **Eunita A. Ochola<sup>1¶</sup>, Marshal M. Mweu<sup>2¶</sup>**

6 <sup>1</sup> Department of Medical Laboratory Science, Faculty of Health Sciences, South Eastern  
7 Kenya University, Kitui, Kenya

8 <sup>2</sup>Department of Public and Global Health, Faculty of Health Sciences, University of Nairobi,  
9 Nairobi, Kenya

10

11 \*Corresponding author

12 Email: [echola@seku.ac.ke](mailto:echola@seku.ac.ke)

13 ¶These authors contributed equally to this work.

14

15

## 16 Abstract

17 The absence of an accurate reference test complicates the evaluation of tuberculosis (TB)  
18 diagnostic tests among people living with Human Immunodeficiency Virus (PLWHIV). The  
19 objective of this study was to estimate (using Bayesian latent class models [BLCM]) the  
20 sensitivity (Se), specificity (Sp) and negative and positive predictive values (NPV and PPV) of  
21 sputum smear microscopy (SSM), Xpert Ultra and lipoarabinomannan antigen (LAM) tests  
22 for TB among PLWHIV in Nairobi, Kenya.

23 This cross-sectional study enrolled a total of 190 patients aged  $\geq 18$  years with presumptive  
24 TB seeking treatment at the Kibra Community Health Center Comprehensive Care Centre  
25 (CCC) clinic between September 2022 and March 2023. The diagnostic data obtained from  
26 the three tests were analysed using a BLCM framework to derive accuracy estimates of the  
27 three diagnostic tests.

28 The Xpert Ultra assay registered a higher Se (85.0; 95% PCI [41.4 – 99.4]) compared to  
29 LAM (26.8; 95% PCI [4.7 – 67.6]) and SSM (56.7 [16.4 – 97.4]). However, SSM had the  
30 highest Sp (99.6; 95% PCI [97.7 – 100.0]). The Xpert Ultra assay yielded the highest overall  
31 combination of Se and Sp at 80.8% (95% PCI [37.0 – 96.5]). On predictive values, SSM  
32 recorded the highest PPV at 84.5% (95% PCI [38.4 – 99.4]). Nonetheless, all the tests  
33 exhibited noticeably high NPVs (>96%).

34 An optimal testing approach in this low-prevalence TB setting could entail an initial  
35 screening with the more sensitive Xpert Ultra test, with any resultant positives retested with  
36 the more specific SSM test - a two-test serial testing strategy.

37

38

## 39 Introduction

40 Worldwide, tuberculosis (TB) ranks among the main causes of mortality from a single  
41 pathogenic agent(1). Human Immunodeficiency Virus (HIV) infected patients have a 20 to 30  
42 fold higher probability of contracting TB(2). As of 2017, approximately 9% of the 10 million  
43 new TB cases were people living with HIV (PLWHIV), with Africa accounting for a 72%  
44 disproportionate share(3). Kenya ranks amid the high-TB burden nations whose primary  
45 cause of death is TB(4).

46

47 In Kenya, pulmonary TB is the most prevalent type and 66% of TB cases occur among those  
48 aged  $\leq 44$  years(5). In line with the national TB diagnosis and treatment guidelines, the  
49 commencement of TB treatment is informed by bacteriological confirmation of *Mycobacterium*  
50 *tuberculosis* (MTB). However, clinical diagnosis where bacteriological confirmation is not  
51 possible may suffice for initiation of treatment(6).

52

53 Sputum smear microscopy (SSM) has been the main diagnostic tool for TB especially in  
54 developing countries (7). It is extensively used because it is easy to run, rapid, inexpensive  
55 and has high specificity (Sp) for TB diagnosis (8, 9). Nevertheless, it has a limited sensitivity  
56 (Se) of approximately 10,000 TB bacilli/ml of sputum. Notably, its poor Se poses a challenge  
57 for diagnosis of TB in PLWHIV since they have fewer bacilli in their sputum (10).

58

59 Diagnostic tests with improved Se and rapid turnaround time among PLWHIV could lead  
60 to improved patient outcomes, reduced mortality and lower progressive transmission of TB  
61 (11). The real time polymerase chain reaction (PCR) assay utilizing the gene Xpert platform  
62 such as Xpert Ultra, offers better test Se and Sp with ability to discriminate between  
63 tuberculous and non-tuberculous mycobacteria(12). Moreover, the test may detect at least

64 15.6 Colony forming units (CFU) of MTB/ml in sputum samples in under two hours(12).  
65 Nonetheless, the technical and operational cost implications of the diagnostic test in resource-  
66 limited settings remain a challenge(13, 14).

67

68 With sputum production among HIV infected individuals being limited(15), the need for  
69 alternative biological specimens for the diagnosis of TB arises. A rapid  
70 immunochromatographic test detecting the *Mycobacterium* cell wall antigen  
71 lipoarabinomannan (LAM) in urine samples is available as a point-of-care test for TB (16).  
72 The test is easy to run, has no need for specialized equipment or laboratory facilities and  
73 results are obtainable within 25 minutes – rendering the test field applicable. Moreover,  
74 among PLWHIV, the test displays high Sp, with Se increasing with diminishing CD4  
75 counts(15-18).

76

77 Diagnostic studies evaluating the performance of SSM, Xpert Ultra and TB LAM among  
78 PLWHIV have previously been conducted globally (19, 20). A major shortcoming of these  
79 evaluations is that the index tests were evaluated against imperfect reference standards, thus  
80 introducing bias in the accuracy estimates of the evaluated tests(21). A superior alternative  
81 involves the use of latent class models fit using Bayesian methods that allow for concurrent  
82 evaluation of Se and Sp of two or more tests without prior knowledge of the unobserved  
83 disease status of individuals(22). Consequently, the objective here was to estimate the Se and  
84 Sp as well as the predictive values of SSM, Xpert Ultra and LAM tests for TB among HIV  
85 patients within an informal outpatient setting using a Bayesian latent class model (BLCM)  
86 framework.

87

88

## 89 **Materials and Methods**

### 90 **Study setting, design and population.**

91 The study was carried out at the Kibra Community Health Centre; a level three state-run  
92 facility located in the southern part of Nairobi. Notably, the facility serves an immediate large  
93 informal-settlement population characterised by a high dual burden of HIV/AIDS and TB,  
94 which are leading causes of mortality in slums(23). It registers around 150-200 out-patients  
95 daily, conducts approximately 50-60 deliveries monthly and offers comprehensive care clinic  
96 (CCC) services to over 1,500 patients per month.

97 A facility-based cross-sectional study was employed to evaluate the performance of the three  
98 diagnostic tests for TB. The rationale for the choice of this design stems not only from the  
99 descriptive nature of the study but also the ease of recruitment of study participants  
100 presenting to the CCC clinic for care.

### 101 **Sample size and participant selection**

102 The required sample size was derived using the McNemar's sample size formula for paired  
103 proportions(24):

$$104 \quad n_{per\ test} = \left( \frac{Z_{\alpha/2} \sqrt{p_{disc}} + Z_{\beta} \sqrt{p_{disc} - p_{diff}^2}}{p_{diff}} \right)^2$$

$$105 \quad p_{disc} = (1 - Se_1) + (1 - Se_2)$$

$$106 \quad p_{diff} = (1 - Se_1) - (1 - Se_2)$$

107

108 Where:  $n_{per\ test}$  = sample size required for each test,  $Z_{\frac{\alpha}{2}}$  (1.96) is the value required for the  
109 two-sided 95% confidence level, and  $Z_{\beta}$  (-0.84) is the value specifying the desired power of  
110 80%.  $Se_1$  and  $Se_2$  are estimates of Se of the Gene xpert MTB/RIF and SSM respectively from  
111 literature i.e.  $Se_1$  is 90.3% and  $Se_2$  is 67.1% (25).

112 As per the above mentioned figures, a total sample size of 190 was generated, after an upward  
113 adjustment by 5% to account for non-response.

114 To obtain the required sample, individuals visiting the hospital's CCC clinic were  
115 systematically random sampled in their order of arrival where every seventh person (after an  
116 initial random start) who met the eligibility criteria was selected. Eligibility was limited to  
117 PLWHIV (symptomatic or asymptomatic for TB) aged  $\geq 18$  years who at the time of  
118 recruitment (28<sup>th</sup> September 2022- 31<sup>st</sup> March 2023) were visiting the CCC at the facility for  
119 care and consented to participation in the study. Importantly, recruitment followed triage by  
120 the clinic nurse and examination by a physician.

## 121 **Ethical considerations**

122 Written permission to conduct this study was obtained from and approved from the Kenyatta  
123 National Hospital -University of Nairobi Ethics and Research Committee (Ref. No.  
124 KNH/ERC/R/145 and KNH/ ERC/Mod & SAE/347), the Nairobi metropolitan Services  
125 (Ref. No. EOP/NMS/HS/222), as well as the National Commission for Technology and  
126 Innovation (NACOSTI) (Ref. No. NACOSTI/P/21/14098). Moreover, a written informed  
127 consent was secured from individual patients prior to enrolling them into the study.

128

## 129 **Sample collection**

130 Participants were provided with clear instructions on collection of urine and sputum samples.  
131 Of note, the LAM and SSM tests were carried out immediately at the facility's laboratory by  
132 a trained laboratorian. Samples for the Xpert Ultra assay were stored in cooler boxes and  
133 delivered to a referral laboratory for processing. On enrolment, the participants'  
134 sociodemographic characteristics (age, sex, marital status, level of education, area of  
135 residence, occupation and highly active antiretroviral therapy status (HAART) were  
136 recorded.

137

## 138 **Target condition**

139 The infection (latent) status being targeted by the three tests (Xpert Ultra, SSM and LAM)  
140 constitutes a respiratory or urine sample carrying either the live MTB, its DNA or cell wall  
141 LAM antigen at any concentration.

## 142 **Sputum Smear Microscopy (SSM)**

143 This was performed as per standard guidelines(7). Briefly, a sputum smear covering 2cm by  
144 1 cm on the centre of the slide was prepared immediately after receipt of the sample. The  
145 smears were then stained with the primary stain 1% Carbol fuchsin for a period not exceeding  
146 10 minutes. Decolourisation was then performed by flooding the slides with 25% sulphuric  
147 acid for 3 minutes and subsequently the counterstain 0.1% methylene blue was added for 1  
148 minute. Slides were rinsed before every staining stage and excess water drained by gently  
149 tilting each slide. The slides were thereafter examined under a light microscope at 100x  
150 magnification. *Mycobacterium* quantification was achieved by counting the acid fast bacteria  
151 (AFB) as per the International Union Against TB and Lung Disease recommended grading

152 of sputum smear microscopy(7). For analytical purposes, AFB counts above zero constituted  
153 a positive result; otherwise negative.

### 154 **Gene Xpert Mycobacterium/ Rifampicin Ultra (Xpert Ultra)**

155 This was carried out as described elsewhere(26). Briefly, a sample reagent (a constitution of  
156 sodium hydroxide and Isopropanol) was added into a sputum sample in a ratio of 2:1 for  
157 liquefaction and inactivation of the sputum. The mixture was then vigorously shaken and  
158 incubated at room temperature for 15 minutes. The liquefied specimen was afterwards  
159 pipetted into the test cartridge (Cat. No. 42722, Cepheid). The pre-labelled test cartridge was  
160 loaded into the MTB/RIF test platform (Cepheid) where automated testing commenced. The  
161 semi-nested real time amplification and detection occurred in an integrated reaction tube and  
162 the results were printed. Results were interpreted as positive when MTB was detected.

### 163 **Lateral Flow Urine Lipoarabinomannan (LAM)**

164 Alere Determine™ TB LAM antigen kit (Cat No. 238237, Abbott Diagnostics Scarborough)  
165 was used to test for the presence of TB LAM antigen in collected urine samples. This was  
166 executed as per the instructions in the Alere Determine™ TB LAM antigen manual (27). A  
167 total of 60ul of urine was added into the strip sample well. In order to allow for the urine to  
168 flow towards both the test and control windows, the strip was incubated at room temperature  
169 for 25 minutes. A positive result was denoted by the appearance of two colour bands; one band  
170 on the control line being indicative of a negative result.

### 171 **Statistical analysis**

172 A Bayesian latent class model fitted in OpenBUGS v3.2.2(28) but called from R software  
173 through the 'BRugs' package(29) was used to estimate the TB prevalence, Se and Sp of the  
174 three tests together with their predictive values. The guidelines for standards for reporting



175 diagnostic accuracy studies that use BLCMs were used to inform the analysis and reporting  
176 of the results (30). The model code is available as underlying data(31).

177

178 Three assumptions are necessary when fitting a BLCM(32). Firstly, the tests should be  
179 conditionally independent given the TB infection status. This was met since microscopy  
180 targets the live bacterium, Xpert Ultra amplifies and detects the *Mycobacterium* DNA and TB  
181 LAM detects the *Mycobacterium* cell wall LAM antigen. Hence, the probability of testing  
182 either positive or negative on one diagnostic tool did not depend on the outcome of the other  
183 tests. Secondly, the  $Se$  and  $Sp$  of the tests being evaluated should be constant across the  
184 subpopulations studied. With a single target population, as was the case here, the tests'  
185 constancy premise was likely to be upheld. Thirdly, the target population should consist of  
186 two or more subpopulations with different prevalences. In situations where only a single  
187 population exists, at least three tests are necessary to provide sufficient degrees of freedom to  
188 achieve model identifiability (30)

189

190 A multinomial distribution was assumed for the counts ( $O$ ) of the different test combinations  
191 (e. g. +, +, +) and took the form below:

$$192 \quad O \mid Se_i Sp_i P \sim \text{multinomial} (Prob, n)$$

193 Where  $Se_i$  and  $Sp_i$  reflect the specific test characteristics of the individual tests ( $i = 1, 2, 3$ ),  
194  $P$  denotes the prevalence for the singular population,  $Prob$  is a vector of probabilities of  
195 observing different test combinations and  $n$  denotes the sample size of the study population.  
196 As an illustration, the probability of an individual testing positive on all three tests is given  
197 by:

198

$$199 \quad Prob = \Pr(T_1^+ T_2^+ T_3^+ | D^+) + \Pr(T_1^+ T_2^+ T_3^+ | D^-)$$

200 
$$= Se_1 Se_2 Se_3 P + [1 - Sp_1][1 - Sp_2][1 - Sp_3][1 - P]$$

201 With three tests, a total of seven degrees of freedom was sufficient to estimate the required  
202 seven parameters (the Se and Sp of the three tests together with the single population  
203 prevalence). Since there was no reliable prior information for any of the tests, uninformative  
204 priors (*beta* (1, 1)) were used as initial parameters for the model.

205 The positive predictive value (PPV) and negative predictive value (NPV) of the test (*i*) were  
206 estimated as follows:

207 
$$ppv_i = PSe_i / (PSe_i + [1 - P][1 - Sp_i])$$

208 
$$npv_i = [1 - P]Sp_i / (P[1 - Se_i] + [1 - P]Sp_i)$$

209 Two Markov Chain Monte Carlo chains each having different values were used to initialise  
210 the Bayesian model. Convergence of the chains was then evaluated via the time series plots of  
211 selected variables and the Gelman-Rubin diagnostic plots. The posterior distributions of the  
212 test estimates (Se, Sp and the predictive values) and the population prevalence were reported  
213 as the median and the associated 95% posterior credible intervals (PCI). The Youden index  
214 which is a measure of a test's overall diagnostic ability was also computed as :  $Se + Sp - 1$   
215 (33).

## 216 **Results**

217 Of the 190 participants, two were unable to provide all the required samples and were thus  
218 excluded from the analysis. Another five were excluded on the basis of their Xpert Ultra  
219 results being invalid.

220 The sociodemographic characteristics and information on HAART status is as shown in  
221 Table 1. The median age of the participants was 43 years (Range: 19 – 82 yrs). The majority  
222 of participants were female (64.0%, n=117), married (60.7%, n=111), with only 2.2% (n=4)

223 lacking a formal education. A substantial percentage of the participants was on HAART  
224 (97.5%, n=178).

225

226 **Table 1: Summary statistics on the sociodemographic characteristics and information**

227 **on HAART status for HIV patients presenting to a primary health facility in an**

228 **informal settlement, Nairobi County, Kenya. (n=183)**

| Variable                  | Values              | Median | Range  | Frequency n (%) |
|---------------------------|---------------------|--------|--------|-----------------|
| <b>Age</b>                |                     |        |        |                 |
|                           |                     | 43     | 19-82  |                 |
| <b>Weight</b>             |                     |        |        |                 |
|                           |                     | 60     | 40-101 |                 |
| <b>Sex</b>                |                     |        |        |                 |
|                           | Male                |        |        | 66(36.1)        |
|                           | Female              |        |        | 117(64.0)       |
| <b>Marital status</b>     |                     |        |        |                 |
|                           | Married             |        |        | 111(60.7)       |
|                           | Single              |        |        | 50(27.3)        |
|                           | Separated/ divorced |        |        | 18(9.8)         |
|                           | Widowed             |        |        | 4(2.2)          |
| <b>Level of education</b> |                     |        |        |                 |
|                           | None                |        |        | 4(2.2)          |
|                           | Primary             |        |        | 91(49.7)        |
|                           | Secondary           |        |        | 69(37.7)        |
|                           | Tertiary            |        |        | 19(10.4)        |
| <b>Area of residence</b>  |                     |        |        |                 |
|                           | Formal              |        |        | 60(32.8)        |
|                           | Informal            |        |        | 123(67.2)       |
| <b>Occupation</b>         |                     |        |        |                 |
|                           | Employed            |        |        | 67(36.6)        |
|                           | Unemployed          |        |        | 116(63.4)       |
| <b>HAART</b>              |                     |        |        |                 |
|                           | Naïve               |        |        | 5(2.7)          |
|                           | Experienced         |        |        | 178(97.3)       |

229 HAART; Highly Active Antiretroviral Therapy

230

231 The cross-tabulated counts of the tests' outcomes are displayed in Table 2.

232 **Table 2: Cross- classified results for LAM, Xpert Ultra and SSM tests for diagnosis of**  
 233 **TB among PLWHIV presenting to the Kibra Community Health Centre CCC clinic,**  
 234 **Nairobi County, Kenya. (n=183)**

**Cross-tabulated counts of the three test outcomes**

| Stratum           | Test outcomes combinations (LAM, XPRT ULTRA & SSM) |     |      |      |       |       |       |       | Total (%)  |
|-------------------|----------------------------------------------------|-----|------|------|-------|-------|-------|-------|------------|
|                   | +++                                                | ++- | + -+ | - ++ | + - - | - + - | - - + | - - - |            |
| Single population | 1                                                  | 1   | 0    | 3    | 21    | 8     | 0     | 149   | 183 (100%) |

235 LAM; Lipoaribomannan, SSM; Sputum Smear Microscopy

236

237 The estimates of the Se and Sp of the three tests, along with their respective predictive values  
 238 and the prevalence of MTB infection are shown in Table 3. The Xpert Ultra assay registered  
 239 a higher Se (85.0; 95% PCI [41.4 – 99.4]) compared to LAM (26.8; 95% PCI [4.7 – 67.6])  
 240 and SSM (56.7 [16.4 – 97.4]). However, SSM displayed the highest Sp (99.6; 95% PCI [97.7  
 241 – 100.0]). As per the Youden indices, Xpert Ultra yielded the highest overall combination of  
 242 Se and Sp at 80.8% (95% PCI [37.0 – 96.5]). On predictive values, SSM recorded the highest  
 243 PPV at 84.5% (95% PCI [38.4 – 99.4]). Nonetheless, all the tests exhibited noticeably high  
 244 NPVs (>96%). The true prevalence of MTB infection in this HIV-infected outpatient  
 245 population was 4.1% (95% PCI [1.2 – 11.2]).

246

247 **Table 3. Estimates of prevalence, sensitivity, and specificity of LAM, Gene Xpert**  
 248 **Ultra, and SSM tests for MTB infection among HIV patients as well as their**  
 249 **corresponding predictive values and Youden indices.**

| Parameter         | Estimate (95% PCI) |
|-------------------|--------------------|
| $Se_{LAM}$        | 26.8 (4.7 – 67.6)  |
| $Se_{Xpert}$      | 85.0 (41.4 – 99.4) |
| $Se_{SSM}$        | 56.7 (16.4 – 97.4) |
| $Sp_{LAM}$        | 87.6 (82.1 – 92.0) |
| $Sp_{Xpert}$      | 96.0 (91.6 – 99.6) |
| $Sp_{SSM}$        | 99.6 (97.7 – 100)  |
| $P$               | 4.1 (1.2 – 11.2)   |
| $NPV_{LAM}$       | 96.7 (89.7 – 99.3) |
| $NPV_{Xpert}$     | 99.4 (95.1 – 100)  |
| $NPV_{SSM}$       | 98.3 (91.5 – 100)  |
| $PPV_{LAM}$       | 8.3 (1.1 – 26.8)   |
| $PPV_{Xpert}$     | 45.3 (13.5 – 94.8) |
| $PPV_{SSM}$       | 84.5 (38.4 – 99.4) |
| $Y.index_{LAM}$   | 14.3 (-8.9 – 55.6) |
| $Y.index_{Xpert}$ | 80.8 (37.0 – 96.5) |
| $Y.index_{SSM}$   | 56.2 (15.7 – 96.8) |

251 Se; Sensitivity, Sp; Specificity, PCI; Posterior confidence interval, LAM; Lipoaribomannan, P;

252 Prevalence, NPV; Negative predictive value, PPV; Positive predictive values

253

254

## 255 Discussion

256 This study has utilized Bayesian latent class analysis for the estimation of the accuracy of  
257 SSM, Xpert Ultra and LAM tests (together with their corresponding predictive values) for  
258 the diagnosis of TB infection among PLWHIV. This is a key strength in this study since  
259 BLCM allows for the estimation of index tests' characteristics devoid of classification errors  
260 typically inherent in traditional evaluation studies employing the use of imperfect reference  
261 standards(21). Accordingly, the estimates obtained from this study can be considered  
262 generalisable to settings with similar MTB burden among PLWHIV.

263

264 On Se, Xpert Ultra assay recorded the highest Se of the three tests. This result is in agreement  
265 with previous reports that demonstrated the superiority of Xpert Ultra Se over other tests in  
266 TB screening and diagnosis among PLWHIV in outpatient settings. In particular, in a  
267 systematic review involving studies conducted in high TB prevalence settings among  
268 PLWHIV, the Xpert Ultra test Se ranged between 81% - 90%(20). The superiority of the  
269 test's Se owes to its low detection limit of tubercle bacilli (16 CFU/ ml of sputum)(34)  
270 compared to SSM whose threshold is 5,000 - 10,000 CFU/ ml of sputum (35) and LAM at ~  
271 2000 CFU / ml (36, 37).

272 The LAM test exhibited the lowest Se in the diagnosis of TB in the present study. This  
273 performance is comparable with findings from studies carried out in other outpatient settings.  
274 For instance, among existing, ART-naïve and newly diagnosed HIV patients presenting to  
275 outpatient facilities in LMICs, LAM's Se was found to range between 25% - 30% (17, 36, 38,  
276 39). Notably, an inverse relationship has been demonstrated, with LAM's test Se increasing  
277 with reducing CD4 counts among critically ill HIV patients(17, 40). LAM Se was observed

278 to be at its highest ( $\geq 65\%$ ) among patients with CD4 counts  $< 50$  cells/ul and Se of  $35\%$ - $55\%$   
279 for patients with CD4 counts between  $100$  and  $200$  cells/ul respectively (17, 40). Increased  
280 uptake of ARV therapy in the present study setting may have contributed to improved CD4  
281 counts in the patient population resulting in a low Se of the LAM test - underscoring its  
282 limited utility in this setting. SSM registered a test Se of  $56.7\%$  which falls within the  $18\%$  -  
283  $94.2\%$  range observed in other studies(41, 42). The wide variability in performance is  
284 attributable to the number of CFUs available in a sample, with Se increasing with higher  
285 CFUs. Moreover, the test Se is also highly dependent on user expertise and other technical  
286 and operational factors (42).

287 As regards Sp, SSM exhibited the highest which is consistent with findings from studies  
288 carried out in outpatient settings among PLWHIV(43, 44). The Sp displayed by LAM is also  
289 corroborated by findings from other studies carried out in similar low-resource settings  
290 where specificities ranging between  $>90\%$ - $100\%$  were registered (36, 38, 45, 46). Xpert Ultra  
291 Sp is in agreement with specificities found in other similar settings where the test Sp was  
292 reported to range between  $78\%$ -  $96\%$  (20, 47).

293 False negative and false positive results compromise Se and Sp estimates respectively. As for  
294 LAM and SSM, false negative results are more likely to occur in patients with bacterial load  
295 below the tests detection limits(48). Additionally, LAM is more likely to give false negative  
296 results in patients who have already received anti-TB treatment(49). False positive results by  
297 LAM have been demonstrated in samples contaminated with non-Mycobacterial pathogens  
298 such as *Nocardia* and *Candida* spp. that similarly exhibit LAM-like glycoprotein antigen(46).  
299 SSM is also unable to distinguish MTB from other smear-positive *Mycobacteria* spp.(50). False  
300 positives by Xpert Ultra could be attributable to detection of MTB DNA in patients recently  
301 cured of TB (44).

302



303 Notably, in this population, the three tests' sensitivities displayed wide credible intervals  
304 (signifying low precision of the estimates) since there were few diseased individuals. In  
305 contrast, the tests' Sp's demonstrated high precision owing to the significant number of truly  
306 non-diseased individuals. Overall, in this low-prevalence TB setting, Xpert Ultra affords good  
307 promise for informing treatment and surveillance for TB among PLWHIV.

308

309 With low MTB prevalence (4.1%), generally low PPVs but high NPVs would be anticipated  
310 for the three tests. These estimates signify a stronger confidence in a negative than a positive  
311 test result. Consequently, in this low-prevalence setting where the probability of false  
312 positives is highly contemplated, a multiple testing strategy with serial interpretation of the  
313 test results may be necessary in order to raise the confidence in a positive test result. This  
314 could entail an initial screening with the more sensitive Xpert Ultra test, with any resulting  
315 positives followed up with the more specific SSM test. This approach should assure that false  
316 positive individuals are not unnecessarily subjected to protracted therapy for TB.

## 317 **Conclusions**

318 The Xpert Ultra assay registered the highest Se compared to SSM and LAM. However, SSM  
319 registered the highest Sp and thus PPV estimate. Nevertheless, the three tests recorded  
320 similar NPVs. Owing to the low prevalence of TB in the study setting, an optimal testing  
321 approach could entail an initial screening with the more sensitive Xpert Ultra assay, with any  
322 resultant positives re-tested with the more specific SSM test – a serial testing strategy - to  
323 bolster the overall PPV of a TB testing and surveillance programme.

324

## 325 **Acknowledgments**

326 The authors sincerely thank the study participants, the administration and staff at Kibra  
327 Community Health Centre for making it possible to realise this research work.

328

329

## 330 **References**

331 1. WHO. World Health Organization annual report 2019 WHO Country Office  
332 Lebanon: health for all. Cairo: World Health Organization. Regional Office for the Eastern  
333 Mediterranean, 2020 2020-06. Report No.: 9789290223207.

334

335 2. WHO. WHO meeting report of a technical expert consultation: non-inferiority  
336 analysis of Xpert MTF/RIF Ultra compared to Xpert MTB/RIF. Geneva: World Health  
337 Organization. Geneva: 2017.

338

339 3. World Health O. Global tuberculosis report 2018. Geneva: World Health  
340 Organization, 2018 2018. Report No.: 9789241565646.

341

342 4. Enos M, Sitienei J, Ong'ang'o J, Mungai B, Kamene M, Wambugu J, et al. Kenya  
343 tuberculosis prevalence survey 2016: Challenges and opportunities of ending TB in Kenya.  
344 PLoS One. 2018;13(12):e0209098. doi: 10.1371/journal.pone.0209098. PubMed PMID:  
345 30586448; PubMed Central PMCID: PMC6306266.

346

347 5. MOH. Kenya Tuberculosis Prevalence Survey: Final Survey Report. Nairobi, Kenya:  
348 2016.

349

350 6. MOH. Guidelines for management of Tuberculosis and Leprosy in Kenya. Nairobi,  
351 Kenya: 2013.

- 352 7. Dawson D, Akhtar M, Bretzel G, Boulahbal F, Fattorini L, Feldmann K, et al.  
353 Technical guide sputum examination for Tuberculosis by direct microscopy in low income  
354 countries. 2000.  
355
- 356 8. Akanbi MO, Achenbach C, Taiwo B, Idoko J, Ani A, Isa Y, et al. Evaluation of gene  
357 xpert for routine diagnosis of HIV-associated tuberculosis in Nigeria: A prospective cohort  
358 study. *BMC Pulm Med.* 2017;17(1):87. doi: 10.1186/s12890-017-0430-6. PubMed PMID:  
359 28558662; PubMed Central PMCID: PMC5450144.  
360
- 361 9. Gelaw B, Shiferaw Y, Alemayehu M, Bashaw AA. Comparison of loop-mediated  
362 isothermal amplification assay and smear microscopy with culture for the diagnostic accuracy  
363 of tuberculosis. *BMC Infect Dis.* 2017;17(1):79. doi: 10.1186/s12879-016-2140-8. PubMed  
364 PMID: 28095790; PubMed Central PMCID: PMC5240421.  
365
- 366 10. Behr MA, Warren SA, Salamon H, Hopewell PC, de Leon AP, Daley CL, et al.  
367 Transmission of *Mycobacterium tuberculosis* from patients smear-negative for acid-fast  
368 bacilli. *The Lancet.* 1999;353(9151):444-9. doi: 10.1016/s0140-6736(98)03406-0.  
369
- 370 11. Steingart KR, Schiller I, Horne DJ, Pai M, Boehme CC, Dendukuri N. Xpert(R)  
371 MTB/RIF assay for pulmonary tuberculosis and rifampicin resistance in adults. *Cochrane*  
372 *Database Syst Rev.* 2014(1):CD009593. doi: 10.1002/14651858.CD009593.pub3. PubMed  
373 PMID: 24448973; PubMed Central PMCID: PMC54470349.  
374
- 375 12. Chakravorty S SA, Rowneki, M PH, Cao Y, Ryan J, Banada PP,, Deshpande S SS, Gall  
376 A, Glass J,, Krieswirth B SS, Nabeta P,, Tukvadze N RC, Skrahina A, Tagliani E,, Cirillo DM

377 DA, Denkinger CM, Persing, et al. The new Xpert MTB/RIF Ultra: improving detection of  
378 Mycobacterium tuberculosis and resistance to rifampin in an assay suitable for point-of-care  
379 testing. American Society for Microbiology. 2017;Volume 8(Issue 4).

380

381 13. Steingart KR, Schiller I, Horne DJ, Pai M, Boehme CC, N D. Xpert® MTB/RIF assay  
382 for pulmonary tuberculosis and rifampicin resistance in adults (Review). JohnWiley & Sons,  
383 Ltd. 2014. doi: 10.1002/14651858.CD009593.pub3.

384

385 14. Stephen D. Lawn, Sophie V. Brooks, Kranzer K, MPN, Andrew Whitelaw, Monica  
386 Vogt, et al. Screening for HIV-Associated Tuberculosis and Rifampicin Resistance before  
387 Antiretroviral Therapy Using the Xpert MTB/RIF Assay: A Prospective Study. PLOS  
388 MEDICINE. 2011;8. doi: 10.1371/journal.pmed.1001067.

389

390 15. Peter J, Green C, Hoelscher M, Mwaba P, Zumla A, Dheda K. Urine for the diagnosis  
391 of tuberculosis: current approaches, clinical applicability, and new developments. Curr Opin  
392 Pulm Med. 2010;16(3):262-70. doi: 10.1097/MCP.0b013e328337f23a. PubMed PMID:  
393 20375787; PubMed Central PMCID: PMC5454484.

394

395 16. Huerga H, Ferlazzo G, Bevilacqua P, Kirubi B, Ardizzoni E, Wanjala S, et al.  
396 Incremental Yield of Including Determine-TB LAM Assay in Diagnostic Algorithms for  
397 Hospitalized and Ambulatory HIV-Positive Patients in Kenya. PLoS One.  
398 2017;12(1):e0170976. doi: 10.1371/journal.pone.0170976. PubMed PMID: 28125693;  
399 PubMed Central PMCID: PMC5268475.

400

- 401 17. Drain PK, Losina E, Coleman SM, Giddy J, Ross D, Katz JN, et al. Diagnostic accuracy  
402 of a point-of-care urine test for tuberculosis screening among newly-diagnosed HIV-infected  
403 adults: a prospective, clinic-based study. *BMC infectious diseases*. 2014;14:110. Epub  
404 2014/02/28. doi: 10.1186/1471-2334-14-110. PubMed PMID: 24571362; PubMed Central  
405 PMCID: PMCPmc3944827.
- 406
- 407 18. Shah M, Hanrahan C, Wang ZY, Dendukuri N, Lawn SD, Denkinger CM, et al.  
408 Lateral flow urine lipoarabinomannan assay for detecting active tuberculosis in HIV-positive  
409 adults. *Cochrane Database Syst Rev*. 2016(5):CD011420. doi:  
410 10.1002/14651858.CD011420.pub2. PubMed PMID: 27163343; PubMed Central PMCID:  
411 PMCPMC4916932.
- 412
- 413 19. Cattamanchi A, Dowdy DW, Davis JL, Worodria W, Yoo S, Joloba M, et al.  
414 Sensitivity of direct versus concentrated sputum smear microscopy in HIV-infected patients  
415 suspected of having pulmonary tuberculosis. *BMC Infect Dis*. 2009;9:53. doi: 10.1186/1471-  
416 2334-9-53. PubMed PMID: 19419537; PubMed Central PMCID: PMCPMC2690598.
- 417
- 418 20. Zifodya JS, Kreniske JS, Schiller I, Kohli M, Dendukuri N, Schumacher SG, et al.  
419 Xpert Ultra versus Xpert MTB/RIF for pulmonary tuberculosis and rifampicin resistance in  
420 adults with presumptive pulmonary tuberculosis. *The Cochrane database of systematic*  
421 *reviews*. 2021;2:CD009593. doi: 10.1002/14651858.CD009593.pub5. PubMed PMID:  
422 33616229.
- 423
- 424 21. Claes Enøe, Marios P Georgiadis, Johnson WO. Estimation of sensitivity and  
425 specificity of diagnostic tests and disease prevalence when the true disease state is unknown,  
426 *Preventive Veterinary Medicine*. 2000;45(1-2):61-81.

- 427 22. Joseph L, Gyorkos TW, Coupal L. Bayesian estimation of disease prevalence and the  
428 parameters of diagnostic tests in the absence of a gold standard. *American journal of*  
429 *epidemiology*. 1995;141(3):263-72. Epub 1995/02/01. doi:  
430 10.1093/oxfordjournals.aje.a117428. PubMed PMID: 7840100.
- 431
- 432 23. Beguy D, Elung'ata P, Mberu B, Oduor C, Wamukoya M, Nganyi B, et al. Health &  
433 Demographic Surveillance System Profile: The Nairobi Urban Health and Demographic  
434 Surveillance System (NUHDSS). *International journal of epidemiology*. 2015;44(2):462-71.  
435 doi: 10.1093/ije/dyu251. PubMed PMID: 25596586.
- 436
- 437 24. Connor RJ. Sample size for testing differences in proportions for the paired-sample  
438 design. *Biometrics*. 1987;43(1):207-11. Epub 1987/03/01. PubMed PMID: 3567305.
- 439
- 440 25. Boehme CC, Nicol MP, Nabeta P, Michael JS, Gotuzzo E, Tahirli R, et al. Feasibility,  
441 diagnostic accuracy, and effectiveness of decentralised use of the Xpert MTB/RIF test for  
442 diagnosis of tuberculosis and multidrug resistance: a multicentre implementation study. *The*  
443 *Lancet*. 2011;377(9776):1495-505. doi: 10.1016/s0140-6736(11)60438-8.
- 444
- 445 26. Raja S, Ching J, Xi L, Hughes SJ, Chang R, Wong W, et al. Technology for automated,  
446 rapid, and quantitative PCR or reverse transcription-PCR clinical testing. *Clin Chem*.  
447 2005;51(5):882-90. doi: 10.1373/clinchem.2004.046474. PubMed PMID: 15746302.
- 448
- 449 27. Abbott. Determine™ TB LAM Ag SAVING LIVES with early TB diagnosis in people  
450 with HIV. 2010.

- 451 28. Lunn D, Spiegelhalter D, Thomas A, Best N. The BUGS project: Evolution, critique  
452 and future directions. *Stat Med.* 2009;28(25):3049-67. doi: 10.1002/sim.3680. PubMed  
453 PMID: 19630097.
- 454
- 455 29. Thomas A, O'Hara, R, Ligges, U & Sturtz,. 'Making BUGS open', *R News.*, 2006.
- 456
- 457 30. Kostoulas P, Nielsen SS, Branscum AJ, Johnson WO, Dendukuri N, Dhand NK, et al.  
458 STARD-BLCM: Standards for the Reporting of Diagnostic accuracy studies that use  
459 Bayesian Latent Class Models. *Preventive veterinary medicine.* 2017;138:37-47. doi:  
460 10.1016/j.prevetmed.2017.01.006. PubMed PMID: 28237234.
- 461
- 462 31. Eunita A. Replication Data for: Evaluation of the performance of three diagnostic tests  
463 for Tuberculosis among HIV patients presenting to a health facility in an informal urban  
464 settlement in Nairobi county, Kenya. DRAFT VERSION ed: Harvard Dataverse; 2023.
- 465
- 466 32. Hui SL, Walter SD. Estimating the Error Rates of Diagnostic Tests. *Biometrics.*  
467 1980;36(1):167-71. doi: 10.2307/2530508.
- 468
- 469 33. Schisterman EF, Perkins NJ, Liu A, Bondell H. Optimal Cut-Point and Its  
470 Corresponding Youden Index to Discriminate Individuals Using Pooled Blood Samples.  
471 *Epidemiology.* 2005;16(1):73-81.
- 472
- 473 34. Helb D, Jones M, Story E, Boehme C, Wallace E, Ho K, et al. Rapid detection of  
474 *Mycobacterium tuberculosis* and rifampin resistance by use of on-demand, near-patient  
475 technology. *Journal of clinical microbiology.* 2010;48(1):229-37. doi: 10.1128/JCM.01463-09.  
476 PubMed PMID: 19864480; PubMed Central PMCID: PMC2812290.



477 35. Behr MA, Warren SA, Salamon H, Hopewell PC, Ponce de Leon A, Daley CL, et al.  
478 Transmission of Mycobacterium tuberculosis from patients smear-negative for acid-fast  
479 bacilli. *Lancet*. 1999;353(9151):444-9. doi: 10.1016/s0140-6736(98)03406-0. PubMed PMID:  
480 9989714.

481

482 36. Nakiyingi L, Moodley VM, Manabe YC, Nicol MP, Holshouser M, Armstrong DT, et  
483 al. Diagnostic accuracy of a rapid urine lipoarabinomannan test for tuberculosis in HIV-  
484 infected adults. *Journal of acquired immune deficiency syndromes*. 2014;66(3):270-9. doi:  
485 10.1097/QAI.000000000000151. PubMed PMID: 24675585; PubMed Central PMCID:  
486 PMC4146703.

487

488 37. Kawasaki M, Echiverri C, Raymond L, Cadena E, Reside E, Gler MT, et al.  
489 Lipoarabinomannan in sputum to detect bacterial load and treatment response in patients  
490 with pulmonary tuberculosis: Analytic validation and evaluation in two cohorts. *PLoS Med*.  
491 2019;16(4):e1002780. doi: 10.1371/journal.pmed.1002780. PubMed PMID: 30978194;  
492 PubMed Central PMCID: PMC6461223 following competing interests: MK, TO, RI, RH and  
493 KK are employees of Otsuka Pharmaceutical Co., Ltd. YL is an employee of Otsuka  
494 Pharmaceutical Development & Commercialization, Inc., which is a subsidiary of Otsuka  
495 Pharmaceutical Co., Ltd. During the conduct of the clinical studies, MTG was an employee  
496 of Otsuka (Philippines) Pharmaceutical Inc., which is a subsidiary of Otsuka Pharmaceutical  
497 Co., Ltd. The rest of the authors declare no conflicts of interest associated with this  
498 manuscript. The corresponding author had full access to all the data in the study and had final  
499 responsibility for the decision to submit for publication.

500

501 38. Balcha TTW, N. Sturegard, E. Skogmar, S. Reepalu, A., Jemal ZH, Tibesso G, Schon  
502 T, Bjorkman P. Detection of lipoarabinomannan in urine for identification of active

503 tuberculosis among HIV-positive adults in Ethiopian health centres. *Tropical medicine &*  
504 *international health : TM & IH.* 2014;19(6):734-42. doi: 10.1111/tmi.12308. PubMed PMID:  
505 24684481.

506

507 39. Stephen D Lawn ADK, Monica Vogt, Robin Wood. Diagnostic accuracy of a low-cost,  
508 urine antigen, point-of-care screening assay for HIV-associated pulmonary tuberculosis  
509 before antiretroviral therapy: a descriptive study. 2012. doi: 10.1016/S1473-3099(11)70251-  
510 1.

511

512 40. Aliasgar Esmail a, b Anil Pooran,a,b Natasha F. Sabur,a,c Mohammed Fadul,a,b  
513 Mantaj S. Brar,d Suzette Oelofse,a,b, Michele Tomasicchio a, b Keertan Dheda,a,b,e,f. An  
514 Optimal Diagnostic Strategy for Tuberculosis in Hospitalized HIV-Infected Patients Using  
515 GeneXpert MTB/RIF and Alere Determine TB LAM Ag. *Journal of clinical microbiology.*  
516 2020. doi: 10.1128/JCM.

517

518 41. Jean Claude Semuto Ngabonziza WS, Florence Mutua, Gabriela Torrea, Augustin  
519 Dushime,, Michel Gasana EA, Schifra Uwamungu, Alaine Umubyeyi Nyaruhirira, Dufton  
520 Mwaengo and, Muvunyi CM. Diagnostic performance of smear microscopy and incremental  
521 yield of Xpert in detection of pulmonary tuberculosis in Rwanda. *BMC infectious diseases.*  
522 2016. doi: 10.1186/s12879-016-2009-x.

523

524 42. Mecky Matee LM, Tarja Lounasvaara, Wendy Wieland-Alter,, Richard Waddell JL,  
525 Muhammad Bakari,, Reyn KP aCFv. Sputum microscopy for the diagnosis of HIV-associated  
526 pulmonary tuberculosis in Tanzania. 2008. doi: 10.1186/1471-2458-8-68.

527 43. Catharina C. Boehme MD, Pamela Nabeta, M.D., Doris Hillemann, Ph.D., Mark P.  
528 Nicol, Ph.D., Shubhada Shenai PD, Fiorella Krapp, M.D., Jenny Allen, B.Tech., Rasim  
529 Tahirli, M.D., Robert Blakemore, B.S., Roxana Rustomjee MD, Ph.D., Ana Milovic, M.S.,  
530 Martin Jones, Ph.D., Sean M. O'Brien, Ph.D., David H. Persing MD, Ph.D., Sabine Ruesch-  
531 Gerdes, M.D., Eduardo Gotuzzo, M.D., Camilla Rodrigues, M.D., David Alland MD, and  
532 Mark D. Perkins, M.D. Rapid Molecular Detection of Tuberculosis and Rifampin Resistance.  
533 The New England Journal of Medicine. 2010;363.

534

535 44. Balcells ME, García P, Chanqueo L, Bahamondes L, Lasso M, Gallardo AM, et al.  
536 Rapid molecular detection of pulmonary tuberculosis in HIV-infected patients in Santiago,  
537 Chile. The international journal of tuberculosis and lung disease : the official journal of the  
538 International Union against Tuberculosis and Lung Disease. 2012;16(10):1349-53. Epub  
539 2012/08/07. doi: 10.5588/ijtld.12.0156. PubMed PMID: 22863872.

540

541 45. Paul K. Drain M, MPH<sup>1,2</sup>, Elena Losina, PhD<sup>1,3,4</sup>, Sharon M. Coleman, MS<sup>6</sup>, Janet  
542 Giddy, MBBCh<sup>7</sup>, Douglas Ross, MBBCh, MBA<sup>8</sup>, Jeffrey N. Katz, MD<sup>4</sup>, and Ingrid V.  
543 Bassett, MD, MPH. Value of Urine Lipoarabinomannan Grade and Second Test for  
544 Optimizing Clinic-based Screening for HIV-associated Pulmonary Tuberculosis. 2015.

545

546 46. Peter J, Theron G, Chanda D, Clowes P, Rachow A, Lesosky M, et al. Test  
547 characteristics and potential impact of the urine LAM lateral flow assay in HIV-infected  
548 outpatients under investigation for TB and able to self-expectorate sputum for diagnostic  
549 testing. BMC infectious diseases. 2015;15:262. doi: 10.1186/s12879-015-0967-z. PubMed  
550 PMID: 26156025; PubMed Central PMCID: PMC4495934.

551

- 552 47. Berhanu RH, David A, da Silva P, Shearer K, Sanne I, Stevens W, et al. Performance  
553 of Xpert MTB/RIF, Xpert Ultra, and Abbott RealTime MTB for Diagnosis of Pulmonary  
554 Tuberculosis in a High-HIV-Burden Setting. *Journal of clinical microbiology*. 2018;56(12).  
555 doi: 10.1128/jcm.00560-18.
- 556
- 557 48. Saeed M, Rasheed F, Iram S, Hussain S, Ahmad A, Riaz S, et al. False Negativity of  
558 Ziehl-Neelsen Smear Microscopy: Is the Scale-up the Worth It in Developing Countries?  
559 *Journal of the College of Physicians and Surgeons--Pakistan : JCPSP*. 2018;28(3):201-5. Epub  
560 2018/03/17. doi: 10.29271/jcpsp.2018.03.201. PubMed PMID: 29544576.
- 561
- 562 49. Nel JS, Lippincott CK, Berhanu R, Spencer DC, Sanne IM, Ive P. Does Disseminated  
563 Nontuberculous Mycobacterial Disease Cause False-Positive Determine TB-LAM Lateral  
564 Flow Assay Results? A Retrospective Review. *Clinical infectious diseases : an official  
565 publication of the Infectious Diseases Society of America*. 2017;65(7):1226-8. Epub  
566 2017/06/03. doi: 10.1093/cid/cix513. PubMed PMID: 28575238.
- 567
- 568 50. Maxwell Oluwole Akanbi, Chad Achenbach, Babafemi Taiwo, John Idoko, Agatha Ani,  
569 Yetunde Isa, et al. Evaluation of gene xpert for routine diagnosis of HIV-associated  
570 tuberculosis in Nigeria: A prospective cohort study. *BMC Pulmonary medicine*. 2017. doi:  
571 10.1186/s12890-017-0430-6.
- 572

## 573 **Supporting information**

574 **S1 File. Harvard Dataverse: Replication Data for: Performance of three diagnostic tests**  
575 **for tuberculosis among HIV patients presenting to a primary care facility in an informal**  
576 **settlement in Nairobi County, Kenya.** [https://doi.org/10.7910/DVN/PYRPCQ\(31\)](https://doi.org/10.7910/DVN/PYRPCQ(31))
